# Supplementary material for: A Shift in Central Metabolism Accompanies Virulence Activation in Pseudomonas aeruginosa
Source: PubMed Central journal article supplement (PMC7064766; doi:10.1128/mbio.02730-18), 2020-03-10

Figure S2

A

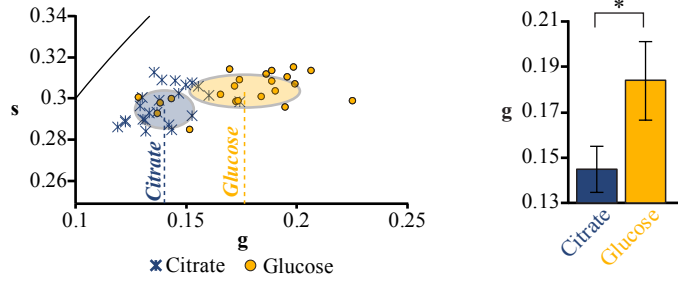

B

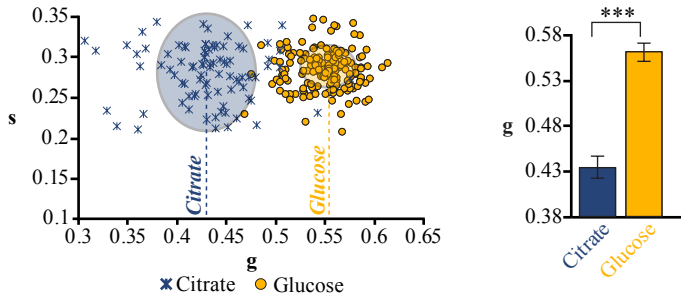

C

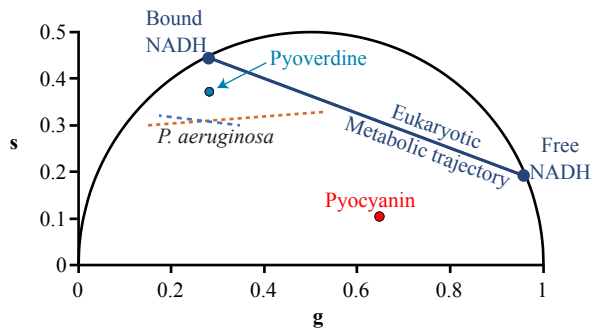

D

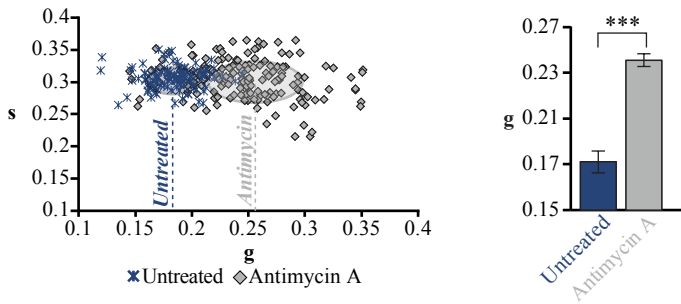

Supplement: mBio.02730-18-sf002.pdf [file mBio.02730-18-sf002.pdf]
