# Supplementary material for: A Shift in Central Metabolism Accompanies Virulence Activation in Pseudomonas aeruginosa
Source: PubMed Central journal article supplement (PMC7064766; doi:10.1128/mbio.02730-18), 2020-03-10
Supplement: mBio.02730-18-st001.pdf [file mBio.02730-18-st001.pdf]

**Table S1**

| <b>Figure</b> | <b>Comparison</b>                                          | <b>t value</b> | <b>Degrees of freedom</b> | <b>p value</b> |
|---------------|------------------------------------------------------------|----------------|---------------------------|----------------|
| 2B            | Citrate, Glycerol                                          | 2.56           | 2                         | 1.25E-01       |
| 4A            | Surface-attached, planktonic (WT, 5 hrs)                   | 8.17           | 2                         | 1.47E-02       |
| 4A            | Surface-attached, planktonic (WT, 6 hrs)                   | 25.70          | 3                         | 1.29E-04       |
| 4B            | Surface-attached, planktonic (WT, 5 hrs)                   | 23.93          | 4                         | 1.81E-05       |
| 4B            | Surface-attached, planktonic (WT, 6 hrs)                   | 12.06          | 4                         | 2.71E-04       |
| 4C            | Surface-attached, planktonic (WT, 5 hrs)                   | 12.62          | 2                         | 6.22E-03       |
| 4C            | Surface-attached, planktonic (WT, 6 hrs)                   | 11.13          | 2                         | 7.98E-03       |
| 5A            | Untreated, glycerol                                        | 8.08           | 3                         | 3.96E-03       |
| 5A            | Untreated, pyruvate                                        | 6.29           | 3                         | 8.12E-03       |
| 5A            | Untreated, citrate                                         | 36.86          | 3                         | 4.39E-05       |
| 5C            | Untreated, glycerol                                        | 7.29           | 2                         | 1.83E-02       |
| 5C            | Untreated, pyruvate                                        | 13.51          | 2                         | 5.43E-03       |
| 5C            | Untreated, citrate                                         | 13.01          | 2                         | 5.86E-03       |
| S1A           | Glycerol, citrate                                          | 4.97           | 3                         | 1.56E-02       |
| S1B           | Glycerol, citrate                                          | 3.08           | 4                         | 3.69E-02       |
| S2A           | Citrate, glucose                                           | 3.38           | 3                         | 4.30E-02       |
| S2B           | Citrate, glucose                                           | 14.92          | 4                         | 1.18E-04       |
| S2D           | Untreated, antimycin A                                     | 14.11          | 3                         | 7.71E-04       |
| S3C           | Surface-attached, planktonic (WT, 5 hrs) (same as Fig. 4A) | 8.17           | 2                         | 1.47E-02       |
| S3C           | Surface-attached, planktonic (WT, 6 hrs) (same as Fig. 4A) | 25.70          | 3                         | 1.29E-04       |
